# Supplementary material for: Interplaying role of healthcare activist and homemaker: a mixed-methods exploration of the workload of community health workers (Accredited Social Health Activists) in India
Source: Springer Nature journal article supplement (doi:10.1186/s12960-020-00546-z), 2021-01-06
Supplement: MOESM1 [file 18741376]

**ASHA workload study**

*Vadu Rural Health Program,*

*KEM Hospital Research Centre Pune and University of Edinburgh, United Kingdom*

|                                                                                                                                                                                   |                                                                                                                                                                             |
|-----------------------------------------------------------------------------------------------------------------------------------------------------------------------------------|-----------------------------------------------------------------------------------------------------------------------------------------------------------------------------|
| Start time: <input type="text"/> <input type="text"/> : <input type="text"/> <input type="text"/>                                                                                 |                                                                                                                                                                             |
| Date: <input type="text"/> <input type="text"/> / <input type="text"/> <input type="text"/> / <input type="text"/> <input type="text"/> <input type="text"/> <input type="text"/> |                                                                                                                                                                             |
| Interviewer Name                                                                                                                                                                  |                                                                                                                                                                             |
| Signature                                                                                                                                                                         |                                                                                                                                                                             |
| Participant's Name                                                                                                                                                                |                                                                                                                                                                             |
| Contact number                                                                                                                                                                    |                                                                                                                                                                             |
| Residence                                                                                                                                                                         |                                                                                                                                                                             |
| Type of Participant:                                                                                                                                                              | 1. ASHA worker<br>2. <del>Block facilitator</del><br>3. <del>ANM</del><br>4. <del>Medical officer</del><br>5. <del>Community member</del>                                   |
| Date of Birth                                                                                                                                                                     | <input type="text"/> <input type="text"/> / <input type="text"/> <input type="text"/> / <input type="text"/> <input type="text"/> <input type="text"/> <input type="text"/> |
| Age (in completed years)                                                                                                                                                          |                                                                                                                                                                             |
| Education (in completed years)                                                                                                                                                    |                                                                                                                                                                             |
| Name of PHC                                                                                                                                                                       |                                                                                                                                                                             |
| Type of PHC                                                                                                                                                                       | 1. Rural<br>2. Tribal                                                                                                                                                       |
| Name of Sub centre                                                                                                                                                                |                                                                                                                                                                             |

**ASHA workload study**

*Vadu Rural Health Program,*

*KEM Hospital Research Centre Pune and University of Edinburgh, United Kingdom*

|                                  |            |    |
|----------------------------------|------------|----|
| Work area                        |            |    |
| Date of Joining                  | □□/□□/□□□□ |    |
| Duration of ASHA work experience | Days       | □□ |
|                                  | Months     | □□ |
|                                  | Years      | □□ |
| End time:                        | □□:□□      |    |

## ASHA workload study

*Vadu Rural Health Program,*

*KEM Hospital Research Centre Pune and University of Edinburgh, United Kingdom*

| <b>Sr. No.</b> | <b>Questions</b>                                                   | <b>Response categories</b>                                                                                                      | <b>Code</b> |
|----------------|--------------------------------------------------------------------|---------------------------------------------------------------------------------------------------------------------------------|-------------|
| 1              | Where is your work area?                                           | 1. Same Village<br>2. Another Village                                                                                           |             |
| 2              | How many villages do you serve?                                    | 1. One<br>2. Two<br>3. Three<br>4. Four or more                                                                                 |             |
| 3              | How much population do you serve?                                  | 5. One<br>6. Two<br>7. Three<br>8. Four or more                                                                                 |             |
| 4              | How many houses do you visit per week?                             | 1. Less than 800<br>2. 801-1200<br>3. 1201-1800<br>4. 1800 or more                                                              |             |
| 5              | How many hours do you work per week?                               | 1. Less than 20<br>2. 21-40<br>3. 40 or more                                                                                    |             |
| 6              | How many times do you visit to BF per month?                       | 1. 1 to 4 times<br>2. More than 4 times                                                                                         |             |
| 7              | Number of visits to ANM per month?                                 | 1. 1 to 4 times<br>2. More than 4 times                                                                                         |             |
| 8              | Your opinion about time requirement for ASHA work                  | 1. Less<br>2. Moderate<br>3. More                                                                                               |             |
| 9              | Your opinion about travel requirement for ASHA work                | 1. Less<br>2. Moderate<br>3. More                                                                                               |             |
| 10             | Your opinion about monetary compensation requirement for ASHA work | 1. Less<br>2. Moderate<br>3. More                                                                                               |             |
| 11             | In last week, was there any day when you felt tired?               | 1. Yes<br>2. No  <b>(Go to question 13)</b> |             |

## ASHA workload study

*Vadu Rural Health Program,*

*KEM Hospital Research Centre Pune and University of Edinburgh, United Kingdom*

|    |                                                                                                               |                                                                                                                                 |  |
|----|---------------------------------------------------------------------------------------------------------------|---------------------------------------------------------------------------------------------------------------------------------|--|
|    |                                                                                                               |                                                                                                                                 |  |
| 12 | If Yes, what were the reasons?                                                                                | 1. Household work<br>2. Social activity<br>3. ASHA work<br>4. Other paid work<br>5. Any other activity<br>(Please mention)_____ |  |
| 13 | In last week, was there any day when you felt that you could not give sufficient time to your family members? | 1. Yes<br>2. No <b>➡ (Go to question 15)</b>                                                                                    |  |
| 14 | If Yes, what were the reasons?                                                                                | 1. Household work<br>2. Social activity<br>3. ASHA work<br>4. Other paid work<br>5. Any other activity<br>(Please mention)_____ |  |
| 15 | In last week, was there any day when you felt that you had insufficient time?                                 | 1. Yes<br>2. No <b>➡ (Go to question 17)</b>                                                                                    |  |
| 16 | If Yes, what were the reasons?                                                                                | 1. Household work<br>2. Social activity<br>3. ASHA work<br>4. Other paid work<br>5. Any other activity<br>(Please mention)_____ |  |
| 17 | In last week, was there any day when you felt rushed?                                                         | 1. Yes<br>2. No <b>➡ (Go to question 19)</b>                                                                                    |  |
| 18 | If Yes, what were the reasons?                                                                                | 1. Household work<br>2. Social activity<br>3. ASHA work<br>4. Other paid work<br>5. Any other activity<br>(Please mention)_____ |  |

**ASHA workload study**

*Vadu Rural Health Program,*

*KEM Hospital Research Centre Pune and University of Edinburgh, United Kingdom*

|                                                                                                 |                                                                                                                |                                                                                                                                                                                        |  |
|-------------------------------------------------------------------------------------------------|----------------------------------------------------------------------------------------------------------------|----------------------------------------------------------------------------------------------------------------------------------------------------------------------------------------|--|
| 19                                                                                              | Are you satisfied with ASHA work?                                                                              | 1. Yes<br>2. No                                                                                                                                                                        |  |
| 20                                                                                              | Are you happy working as an ASHA worker?                                                                       | 1. Yes<br>2. No                                                                                                                                                                        |  |
| 21                                                                                              | Which are the health activities and surveys you did in last 6 months?                                          | 1. _____<br>2. _____<br>3. _____<br>4. _____<br>5. _____<br>6. _____<br>7. _____<br>8. _____<br>9. _____<br>10. _____<br>11. _____<br>12. _____<br>13. _____<br>14. _____<br>15. _____ |  |
| 22                                                                                              | Have you any experience of providing brief advice for smokeless tobacco cessation?                             | 1. Yes<br>2. No                                                                                                                                                                        |  |
| 23                                                                                              | If yes, were there any challenges in doing this? Please tell about those?                                      | _____<br>_____<br>_____<br>_____                                                                                                                                                       |  |
| 24                                                                                              | What training would you need to deliver smokeless tobacco cessation advice?                                    | _____<br>_____<br>_____<br>_____                                                                                                                                                       |  |
| 25                                                                                              | If new health activity is added to your ASHA work, will it be possible to manage within your current schedule? | 1. Yes, possible<br>2. Yes, possible with some modification/alteration<br>3. Not possible                                                                                              |  |
| End time: <input type="text"/> <input type="text"/> : <input type="text"/> <input type="text"/> |                                                                                                                |                                                                                                                                                                                        |  |

**ASHA workload study**

*Vadu Rural Health Program,*

*KEM Hospital Research Centre Pune and University of Edinburgh, United Kingdom*
