# Supplementary material for: Interplaying role of healthcare activist and homemaker: a mixed-methods exploration of the workload of community health workers (Accredited Social Health Activists) in India
Source: Springer Nature journal article supplement (doi:10.1186/s12960-020-00546-z), 2021-01-06
Supplement: MOESM2 [file 18741376]

## ASHA workload study

| PERCEPTIONS, EXPERIENCES AND ATTITUDES TOWARDS WORKLOAD                                                                                                                                                                                                                                                                                                                                                                                                                                                                                                                                                                                                                                                                                                                                                                                                                         |
|---------------------------------------------------------------------------------------------------------------------------------------------------------------------------------------------------------------------------------------------------------------------------------------------------------------------------------------------------------------------------------------------------------------------------------------------------------------------------------------------------------------------------------------------------------------------------------------------------------------------------------------------------------------------------------------------------------------------------------------------------------------------------------------------------------------------------------------------------------------------------------|
| <b>SECTION 1: ABOUT GENERIC WORK</b>                                                                                                                                                                                                                                                                                                                                                                                                                                                                                                                                                                                                                                                                                                                                                                                                                                            |
| <ul style="list-style-type: none"><li>➤ What is your concept of typical day?</li><li>➤ How do you start your day?</li><li>➤ What are other activities you do apart from household work?</li><li>➤ How much time is spent for this work?</li><li>➤ Do you do any other work apart from the work you mentioned earlier?</li></ul>                                                                                                                                                                                                                                                                                                                                                                                                                                                                                                                                                 |
| <b>SECTION 2: ABOUT ASHA WORK</b>                                                                                                                                                                                                                                                                                                                                                                                                                                                                                                                                                                                                                                                                                                                                                                                                                                               |
| <ul style="list-style-type: none"><li>➤ What is your concept of typical day as an ASHA worker?</li><li>➤ What are the health activities you do as an ASHA worker?</li><li>➤ Which are the health activities you perform <b>daily</b>?</li><li>➤ Which are the health activities you perform <b>weekly</b>?</li><li>➤ Which are the health activities you perform <b>monthly</b>?</li><li>➤ Generally how many hours <b>daily</b> are spent in the <b>work area</b>?</li><li>➤ Generally how many <b>days in a month</b> are spent at <b>work area (or field)</b>?</li><li>➤ What is your opinion about <b>time</b> spent in the work area for actual health activities assigned to you?</li><li>➤ What is your opinion about <b>travel</b> for this work?</li><li>➤ What is your opinion about <b>other activities</b> involved in this work? e.g. report preparation</li></ul> |
| <b>SECTION 3: Perceived burden of the work</b>                                                                                                                                                                                                                                                                                                                                                                                                                                                                                                                                                                                                                                                                                                                                                                                                                                  |
| <ul style="list-style-type: none"><li>➤ What is your opinion about current work assigned to you?</li><li>➤ Do you face any difficulties while doing ASHA work?</li><li>➤ Do you feel that you have sufficient <b>time</b> to manage all the activities?</li><li>➤ What is your opinion about <b>interpersonal relationship</b>(with community, ANMs, medical officers etc.)?</li><li>➤ What is your opinion about <b>monetary compensation</b> about ASHA work?</li><li>➤ In comparison with other ASHA workers are there any differences in the <b>setting at work area</b> which have influence on the ASHA work?</li><li>➤ Have you ever felt that you could not complete any task? If so, what were the reasons?</li><li>➤ Have you ever felt that you are overburdened with the work? If so, what were the reasons?</li></ul>                                              |
| <b>SECTION 4: How much more workload can be given?</b>                                                                                                                                                                                                                                                                                                                                                                                                                                                                                                                                                                                                                                                                                                                                                                                                                          |
| <ul style="list-style-type: none"><li>➤ What is your opinion if new health activity is added to your current work? Do you think that new activity will add burden to your current work?</li><li>➤ Will you be able to manage new health activity (in terms of time and travel) along with your current work?</li><li>➤ Can you tell us some of the factors which would help you in performing new activity?</li><li>➤ How will you manage ASHA work along with your household work?</li><li>➤ How do you see yourself in comparison with other individuals in your surroundings in terms of <b>work load</b>?</li><li>➤ How do you see yourself in comparison with other individuals in your surroundings in terms of <b>time</b>?</li></ul>                                                                                                                                    |

## ASHA workload study

- How do you see yourself in comparison with other individuals in your surroundings in terms of **travel**?
- How do you see yourself in comparison with other individuals in your surroundings in terms of **monetary compensation/financial benefit**?

### SECTION 5: About smokeless tobacco cessation

- Have you any experience of providing brief advice for smokeless tobacco cessation?
- If yes, were there any challenges in doing this? Please tell about those?
- What training would you need to deliver smokeless tobacco cessation advice?
