# Supplementary material for: Interplaying role of healthcare activist and homemaker: a mixed-methods exploration of the workload of community health workers (Accredited Social Health Activists) in India
Source: Springer Nature journal article supplement (doi:10.1186/s12960-020-00546-z), 2021-01-06
Supplement: MOESM3 [file 18741376]

## ASHA workload study

|                                                                                                                                                                                                                                                                                                                                                                                                                                                                                                                                                                                                                                      |
|--------------------------------------------------------------------------------------------------------------------------------------------------------------------------------------------------------------------------------------------------------------------------------------------------------------------------------------------------------------------------------------------------------------------------------------------------------------------------------------------------------------------------------------------------------------------------------------------------------------------------------------|
| <b>For Medical officers, ANMs and ASHA supervisors</b>                                                                                                                                                                                                                                                                                                                                                                                                                                                                                                                                                                               |
| <b>SECTION 1:</b><br>Perceptions, experiences and attitudes towards workload                                                                                                                                                                                                                                                                                                                                                                                                                                                                                                                                                         |
| <b>GENERAL</b> <ul style="list-style-type: none"><li>➤ What are the health activities are carried out by ASHAs?</li><li>➤ Which are the health activities that need to be done on <b>daily basis</b>?</li><li>➤ Which are the health activities that need to be done on <b>weekly basis</b>?</li><li>➤ Which are the health activities that need to be done on <b>monthly basis</b>?</li><li>➤ As per your opinion on average how many <b>hours per day</b> are spent for this work?</li></ul>                                                                                                                                       |
| <b>TIME</b> <ul style="list-style-type: none"><li>➤ Generally how many <b>days in a month</b> are spent at <b>work area (or field)</b> by ASHAs?</li><li>➤ Generally how many hours <b>daily</b> are spent in the <b>work area</b> by ASHAs?</li><li>➤ Generally how many hours <b>weekly</b> are spent in the <b>work area</b> by ASHAs?</li><li>➤ Generally how many hours <b>monthly</b> are spent in the <b>work area</b> by ASHAs?</li><li>➤ Generally how many <b>days in a month</b> are spent at <b>sub centre</b> by ASHAs?</li><li>➤ Generally how many <b>days in a month</b> are spent at <b>PHC</b> by ASHAs?</li></ul> |
| <b>TRAVEL</b> <ul style="list-style-type: none"><li>➤ How frequently they need to travel to the <b>work area</b>?</li><li>➤ How frequently they need to travel to the <b>sub centre</b>?</li><li>➤ How frequently they need to travel to the <b>PHC</b>?</li><li>➤ Generally <b>how many days in a month</b> they have to travel as a part of ASHA work?</li></ul>                                                                                                                                                                                                                                                                   |
| <b>OTHER</b> <ul style="list-style-type: none"><li>➤ How frequently ASHAs have to attend meetings?</li><li>➤ How frequently ASHAs have to attend trainings?</li><li>➤ How frequently ASHAs have the documentation work (e.g. report preparation)?</li><li>➤ What is your opinion about ASHAs visits for follow up of with the beneficiaries/ Revisit to the beneficiaries?</li></ul>                                                                                                                                                                                                                                                 |
| <b>MONETARY COMPENSATION</b> <ul style="list-style-type: none"><li>➤ What is your opinion about compensation for ASHA work?</li><li>➤ Is there relation between an attention paid towards health activity and provided compensation?</li><li>➤ Did you ever feel that there is controversy in the work and provided compensation?</li></ul>                                                                                                                                                                                                                                                                                          |
| <b>SECTION 2: ABOUT CURRENT WORKLOAD</b> <ul style="list-style-type: none"><li>➤ What is your opinion about <b>time</b> spent in the work area for actual health activities by ASHAs?</li><li>➤ What is your opinion about <b>travel</b> for this work?</li><li>➤ What is your opinion about <b>other activities</b> involved in this work?(e.g. report preparation)?</li></ul>                                                                                                                                                                                                                                                      |

## ASHA workload study

### **SECTION 3:** Perceived burden of the work

- What is your opinion about current workload of ASHAs?
- Do you feel that they have sufficient time to manage all the activities?
- Can you tell some of the reasons where ASHAs could not complete any task?
- What is your opinion about interpersonal relationship (with community, ANMs, medical officers etc.) and burden of the work?
- Do you see any difference in the work due to differences in area situation (or work setting)?

### **SECTION 4:** How much more workload can be given?

- What is your opinion if new health activity is added to their current work?
- Will they be able to manage new health activity (in terms of time and travel) along with your current work?
- Can you tell us some of the factors which would help them in performing new activity?
